# Supplementary material for: Modification of plasmonic properties in several transition metal-doped graphene studied by the first principles method
Source: Royal Society of Chemistry journal article supplement (doi:10.1039/d2ra06446d), 2023-01-01
Supplement: d2ra06446d1.pdf [file d2ra06446d1.pdf]

## Electronic Supplementary Information (ESI)

### Plasmonic properties modification in several transition metal-doped graphenes studied by the first principle method

Diyan Unmu Dzujah<sup>a</sup>, Abdul-Muizz Pradipto<sup>a</sup>, Rahmat Hidayat<sup>a\*</sup>, Kohji Nakamura<sup>b</sup>

1. In order to predict the charge and magnetic moment of transition metal in each structure, the calculations of TM-doped graphenes, as described in the main text, have been also carried out by involving the spin-polarization effect. This can be done technically by setting the *nspin* parameter in their Quantum Espresso input files to be = 2 or = 1 for the calculations with and without spin polarizations, respectively. The supercell size is 5×5 cells as shown in Figure S1, which were subjected to the optimization calculation before proceeding to further calculations. As a typical example from the calculation results with spin polarization, the PDOS for Co-doped graphene is shown in Figure S2. It is clear that the PDOS for the spin-up and the spin-down configurations are symmetric, indicating a material with approximately zero total magnetization. The charge and magnetic moment in each atom are shown in Table S1 - S6.

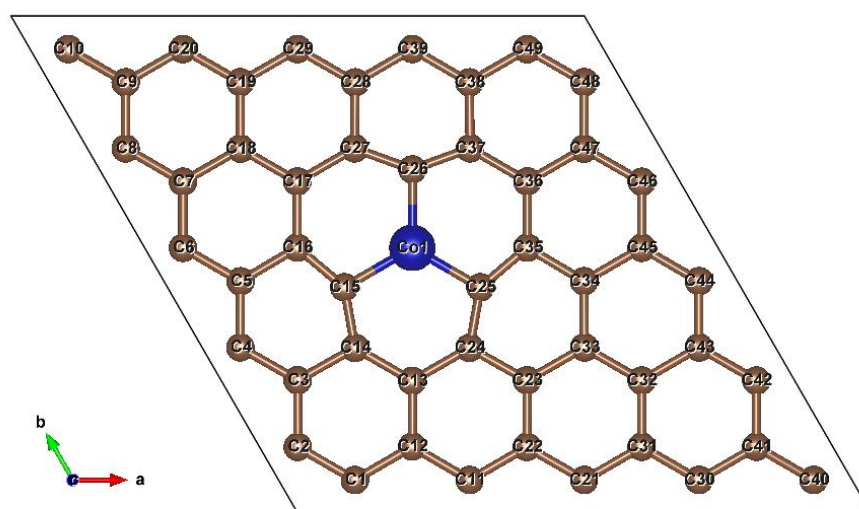

Figure S1. Structure of TM-doped graphene along with each corresponding atomic number.

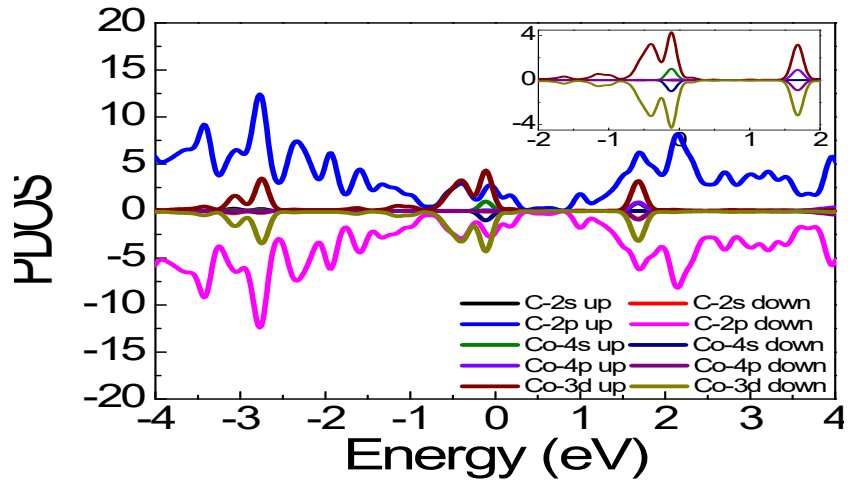

Figure S2. PDOS for Co-doped graphene calculated with spin polarization.

Table S1. Charge and magnetic moment of each atom in pristine graphene structure

| Atom | Charge | Magnetic moment | Atom | Charge | Magnetic moment |
|------|--------|-----------------|------|--------|-----------------|
| C1   | 1.7106 | -0.00010        | C26  | 1.7106 | 0.00010         |
| C2   | 1.7106 | 0.00010         | C27  | 1.7106 | 0.00000         |
| C3   | 1.7106 | 0.00000         | C28  | 1.7106 | 0.00010         |
| C4   | 1.7106 | 0.00010         | C29  | 1.7106 | 0.00000         |
| C5   | 1.7106 | 0.00000         | C30  | 1.7106 | 0.00010         |
| C6   | 1.7106 | 0.00010         | C31  | 1.7105 | 0.00000         |
| C7   | 1.7106 | 0.00000         | C32  | 1.7105 | 0.00010         |
| C8   | 1.7106 | 0.00010         | C33  | 1.7106 | 0.00000         |
| C9   | 1.7106 | 0.00000         | C34  | 1.7105 | 0.00010         |
| C10  | 1.7106 | 0.00010         | C35  | 1.7106 | 0.00000         |
| C11  | 1.7105 | 0.00000         | C36  | 1.7105 | 0.00010         |
| C12  | 1.7105 | 0.00010         | C37  | 1.7106 | 0.00000         |
| C13  | 1.7106 | 0.00000         | C38  | 1.7106 | 0.00010         |
| C14  | 1.7106 | 0.00010         | C39  | 1.7106 | 0.00000         |
| C15  | 1.7106 | 0.00000         | C40  | 1.7106 | 0.00010         |
| C16  | 1.7106 | 0.00010         | C41  | 1.7106 | -0.00010        |
| C17  | 1.7106 | 0.00000         | C42  | 1.7105 | 0.00010         |
| C18  | 1.7106 | 0.00010         | C43  | 1.7106 | 0.00000         |
| C19  | 1.7106 | 0.00000         | C44  | 1.7106 | 0.00010         |
| C20  | 1.7106 | 0.00010         | C45  | 1.7106 | 0.00000         |
| C21  | 1.7105 | 0.00000         | C46  | 1.7105 | 0.00010         |
| C22  | 1.7105 | 0.00010         | C47  | 1.7106 | 0.00000         |
| C23  | 1.7106 | 0.00000         | C48  | 1.7106 | 0.00010         |
| C24  | 1.7106 | 0.00010         | C49  | 1.7106 | -0.00010        |

|     |        |         |     |        |         |
|-----|--------|---------|-----|--------|---------|
| C25 | 1.7106 | 0.00000 | C50 | 1.7106 | 0.00010 |
|-----|--------|---------|-----|--------|---------|

Valence electron of Carbon =  $2s^2 2p^2$

Total Magnetization = 0.00 Bohr mag/cell

Table S2. Charge and magnetic moment of each atom in the Co-doped graphene structure

| Atom | Charge | Magnetic moment | Atom | Charge | Magnetic moment |
|------|--------|-----------------|------|--------|-----------------|
| C1   | 1.4311 | 0.0000          | Co   | 5.8982 | -0.0002         |
| C2   | 1.43   | 0.0000          | C26  | 1.5152 | -0.0001         |
| C3   | 1.4308 | 0.0000          | C27  | 1.4772 | 0.0000          |
| C4   | 1.4354 | 0.0000          | C28  | 1.4309 | 0.0000          |
| C5   | 1.4309 | 0.0000          | C29  | 1.43   | 0.0000          |
| C6   | 1.43   | 0.0000          | C30  | 1.43   | 0.0000          |
| C7   | 1.4312 | 0.0000          | C31  | 1.4322 | 0.0000          |
| C8   | 1.4304 | 0.0000          | C32  | 1.4301 | 0.0000          |
| C9   | 1.4327 | 0.0000          | C33  | 1.4354 | 0.0000          |
| C10  | 1.4304 | 0.0000          | C34  | 1.4309 | 0.0000          |
| C11  | 1.4312 | 0.0000          | C35  | 1.4773 | 0.0000          |
| C12  | 1.4303 | 0.0000          | C36  | 1.4369 | 0.0000          |
| C13  | 1.437  | 0.0000          | C37  | 1.4772 | 0.0000          |
| C14  | 1.4773 | 0.0000          | C38  | 1.4309 | 0.0000          |
| C15  | 1.5148 | -0.0001         | C39  | 1.4354 | 0.0000          |
| C16  | 1.4772 | 0.0000          | C40  | 1.4295 | 0.0000          |
| C17  | 1.4368 | 0.0000          | C41  | 1.4322 | 0.0000          |
| C18  | 1.4304 | 0.0000          | C42  | 1.4301 | 0.0000          |
| C19  | 1.431  | 0.0000          | C43  | 1.4322 | 0.0000          |
| C20  | 1.4304 | 0.0000          | C44  | 1.4295 | 0.0000          |
| C21  | 1.4295 | 0.0000          | C45  | 1.43   | 0.0000          |
| C22  | 1.43   | 0.0000          | C46  | 1.4312 | 0.0000          |
| C23  | 1.4308 | 0.0000          | C47  | 1.4304 | 0.0000          |
| C24  | 1.4773 | 0.0000          | C48  | 1.431  | 0.0000          |
| C25  | 1.5149 | -0.0001         | C49  | 1.43   | 0.0000          |

The valence electrons of Co =  $4s^2 3d^7$  ( $=9e$ ), the valence charge on the Co site =  $5.8982e$ .

Total Magnetization: 0.00 Bohr mag/cell

Table S3. Charge and magnetic moment of each atom in the Ni-doped graphene structure

| Atom | Charge | Magnetic moment | Atom | Charge | Magnetic moment |
|------|--------|-----------------|------|--------|-----------------|
| C1   | 1.592  | 0.0001          | Ni   | 6.9484 | -0.0012         |
| C2   | 1.6007 | -0.0001         | C26  | 1.6108 | 0.0004          |
| C3   | 1.5957 | 0.0002          | C27  | 1.6026 | -0.0002         |
| C4   | 1.5918 | -0.0001         | C28  | 1.5957 | 0.0002          |
| C5   | 1.5956 | 0.0002          | C29  | 1.6007 | -0.0001         |
| C6   | 1.6006 | -0.0001         | C30  | 1.5993 | 0.0001          |
| C7   | 1.592  | 0.0001          | C31  | 1.5956 | -0.0001         |
| C8   | 1.5956 | -0.0001         | C32  | 1.5992 | 0.0001          |
| C9   | 1.598  | 0.0000          | C33  | 1.5918 | -0.0001         |
| C10  | 1.5956 | -0.0001         | C34  | 1.5957 | 0.0002          |
| C11  | 1.592  | 0.0001          | C35  | 1.6027 | -0.0002         |
| C12  | 1.5916 | -0.0001         | C36  | 1.5853 | 0.0001          |
| C13  | 1.5852 | 0.0001          | C37  | 1.6027 | -0.0002         |
| C14  | 1.6025 | -0.0002         | C38  | 1.5958 | 0.0002          |
| C15  | 1.6105 | 0.0004          | C39  | 1.5918 | -0.0001         |
| C16  | 1.6026 | -0.0002         | C40  | 1.6019 | 0.0001          |
| C17  | 1.5852 | 0.0001          | C41  | 1.5956 | -0.0001         |
| C18  | 1.5917 | -0.0001         | C42  | 1.5992 | 0.0001          |
| C19  | 1.5921 | 0.0001          | C43  | 1.5956 | -0.0001         |
| C20  | 1.5956 | -0.0001         | C44  | 1.6018 | 0.0001          |
| C21  | 1.6018 | 0.0001          | C45  | 1.6006 | -0.0001         |
| C22  | 1.6006 | -0.0001         | C46  | 1.5921 | 0.0001          |
| C23  | 1.5957 | 0.0002          | C47  | 1.5917 | -0.0001         |
| C24  | 1.6025 | -0.0002         | C48  | 1.5921 | 0.0001          |
| C25  | 1.6106 | 0.0004          | C49  | 1.6007 | -0.0001         |

The valence electrons of Ni =  $4s^2 3d^8$  ( $=10e$ ), the total charge on the Ni site =  $6.9484e$ .

Total Magnetization: 0.00 Bohr mag/cell

Table S4. Charge and magnetic moment of each atom in the Cu-doped graphene structure

| Atom | Charge | Magnetic moment | Atom | Charge | Magnetic moment |
|------|--------|-----------------|------|--------|-----------------|
| C1   | 1.467  | 0.0017          | Cu   | 7.8941 | 0               |
| C2   | 1.4706 | -9.00E-04       | C26  | 1.527  | 0.0069          |
| C3   | 1.4625 | 0.0014          | C27  | 1.5206 | -0.0014         |
| C4   | 1.464  | -5.00E-04       | C28  | 1.502  | 0.0016          |

|     |        |           |     |        |           |
|-----|--------|-----------|-----|--------|-----------|
| C5  | 1.4624 | 0.0014    | C29 | 1.5005 | -1.00E-03 |
| C6  | 1.4706 | -9.00E-04 | C30 | 1.48   | 0.0022    |
| C7  | 1.467  | 0.0016    | C31 | 1.4757 | -1.00E-03 |
| C8  | 1.4661 | -0.0014   | C32 | 1.48   | 0.0022    |
| C9  | 1.4662 | 0.0073    | C33 | 1.4729 | -8.00E-04 |
| C10 | 1.4661 | -0.0014   | C34 | 1.4739 | 0.0012    |
| C11 | 1.4676 | 0.0038    | C35 | 1.455  | -0.0016   |
| C12 | 1.4722 | -0.0012   | C36 | 1.4228 | 0.0103    |
| C13 | 1.458  | 0.0066    | C37 | 1.4549 | -0.0016   |
| C14 | 1.4575 | -0.0012   | C38 | 1.4738 | 0.0012    |
| C15 | 1.4328 | 0.0052    | C39 | 1.4729 | -8.00E-04 |
| C16 | 1.4575 | -0.0012   | C40 | 1.4729 | 0.002     |
| C17 | 1.4581 | 0.0066    | C41 | 1.4724 | -8.00E-04 |
| C18 | 1.4723 | -0.0012   | C42 | 1.472  | 8.00E-04  |
| C19 | 1.4676 | 0.0038    | C43 | 1.4725 | -8.00E-04 |
| C20 | 1.4744 | -0.0015   | C44 | 1.4729 | 0.002     |
| C21 | 1.4959 | 0.002     | C45 | 1.4742 | -0.0011   |
| C22 | 1.5005 | -1.00E-03 | C46 | 1.4586 | 0.0042    |
| C23 | 1.502  | 0.0016    | C47 | 1.4499 | -0.0018   |
| C24 | 1.5205 | -0.0014   | C48 | 1.4585 | 0.0042    |
| C25 | 1.527  | 0.0069    | C49 | 1.4741 | -0.0011   |

Valence electron of Cu =  $4s^2 3d^9$ ; the total charge on the Cu site =  $7.8941e$ .

Total Magnetization: 0.20 Bohr mag/cell

Table S5. Charge and magnetic moment of each atom in Zn-doped graphene structure

| Atom | Charge | Magnetic moment | Atom | Charge | Magnetic moment |
|------|--------|-----------------|------|--------|-----------------|
| C1   | 1.5175 | 0.0030          | Zn   | 8.901  | 0.1089          |
| C2   | 1.5342 | 0.0013          | C26  | 1.5773 | 0.0515          |
| C3   | 1.5272 | 0.0179          | C27  | 1.5519 | -0.0037         |
| C4   | 1.5181 | -0.0035         | C28  | 1.549  | 0.0056          |
| C5   | 1.5272 | 0.0179          | C29  | 1.5478 | -0.0020         |
| C6   | 1.5342 | 0.0013          | C30  | 1.5338 | 0.0031          |
| C7   | 1.5175 | 0.0030          | C31  | 1.5276 | -0.0023         |
| C8   | 1.5201 | -0.0025         | C32  | 1.5339 | 0.0031          |
| C9   | 1.5187 | 0.0096          | C33  | 1.5231 | -0.0022         |
| C10  | 1.5201 | -0.0025         | C34  | 1.5344 | 0.0089          |
| C11  | 1.518  | 0.0057          | C35  | 1.5176 | 0.0077          |
| C12  | 1.5203 | -0.0029         | C36  | 1.4811 | 0.0190          |
| C13  | 1.4998 | 0.0166          | C37  | 1.5177 | 0.0076          |
| C14  | 1.5228 | 0.0026          | C38  | 1.5344 | 0.0089          |

|     |        |         |     |        |         |
|-----|--------|---------|-----|--------|---------|
| C15 | 1.537  | 0.1758  | C39 | 1.5231 | -0.0022 |
| C16 | 1.5225 | 0.0026  | C40 | 1.5333 | 0.0048  |
| C17 | 1.4998 | 0.0166  | C41 | 1.5259 | -0.0022 |
| C18 | 1.5203 | -0.0029 | C42 | 1.5295 | 0.0017  |
| C19 | 1.5179 | 0.0057  | C43 | 1.5259 | -0.0022 |
| C20 | 1.5245 | -0.0026 | C44 | 1.5333 | 0.0048  |
| C21 | 1.5452 | 0.0032  | C45 | 1.5349 | 0.0003  |
| C22 | 1.5478 | -0.0020 | C46 | 1.5128 | 0.0058  |
| C23 | 1.549  | 0.0056  | C47 | 1.5094 | -0.0031 |
| C24 | 1.552  | -0.0037 | C48 | 1.5129 | 0.0059  |
| C25 | 1.5772 | 0.0520  | C49 | 1.5349 | 0.0003  |

Valence electron of Zn =  $4s^2 3d^{10}$ , the total charge on the Zn site =  $8.901e$ .

Total Magnetization: 1.25 Bohr mag/cell

Table S6. Charge and magnetic moment of each atom in Au-doped graphene structure

| Atom | Charge | Magnetic moment | Atom | Charge | Magnetic moment |
|------|--------|-----------------|------|--------|-----------------|
| C1   | 1.5392 | 0.0000          | Au   | 5.6369 | 0.1116          |
| C2   | 1.5609 | 0.0021          | C26  | 1.6037 | 0.1618          |
| C3   | 1.5563 | 0.0062          | C27  | 1.5596 | 0.0033          |
| C4   | 1.5371 | -0.0006         | C28  | 1.5601 | 0.0184          |
| C5   | 1.5424 | 0.0003          | C29  | 1.5623 | 0.0039          |
| C6   | 1.5472 | -0.0006         | C30  | 1.5556 | 0.0003          |
| C7   | 1.5347 | 0.0004          | C31  | 1.5444 | -0.0008         |
| C8   | 1.5393 | -0.0001         | C32  | 1.5509 | 0.0002          |
| C9   | 1.5437 | -0.0002         | C33  | 1.537  | -0.0006         |
| C10  | 1.5433 | -0.0003         | C34  | 1.5424 | 0.0002          |
| C11  | 1.5392 | 0.0000          | C35  | 1.5325 | -0.0013         |
| C12  | 1.5432 | -0.0002         | C36  | 1.5096 | 0.0095          |
| C13  | 1.5298 | 0.0033          | C37  | 1.5598 | 0.0034          |
| C14  | 1.5661 | 0.0094          | C38  | 1.5602 | 0.0184          |
| C15  | 1.5613 | 0.0337          | C39  | 1.5404 | -0.0018         |
| C16  | 1.5324 | -0.0013         | C40  | 1.561  | 0.0023          |
| C17  | 1.5095 | 0.0095          | C41  | 1.5444 | -0.0008         |
| C18  | 1.531  | -0.0003         | C42  | 1.5509 | 0.0002          |
| C19  | 1.5347 | 0.0002          | C43  | 1.5427 | -0.0007         |
| C20  | 1.5433 | -0.0003         | C44  | 1.549  | 0.0001          |
| C21  | 1.561  | 0.0023          | C45  | 1.5472 | -0.0006         |
| C22  | 1.5608 | 0.0020          | C46  | 1.5347 | 0.0005          |
| C23  | 1.5562 | 0.0061          | C47  | 1.5311 | -0.0003         |
| C24  | 1.5659 | 0.0094          | C48  | 1.5347 | 0.0002          |

|     |        |        |     |        |        |
|-----|--------|--------|-----|--------|--------|
| C25 | 1.5611 | 0.0330 | C49 | 1.5624 | 0.0039 |
|-----|--------|--------|-----|--------|--------|

The valence electrons of Au =  $6s^1 5d^{10}$  ( $=11e$ ), the valence charge on the Au site =  $5.6369e$ .

Total Magnetization: 1.00 Bohr mag/cell

Based on the above calculation data, all transition metal dopants, except Au, losses almost  $3e$  which looks like a cation with around  $3+$  charge. Those  $3e$  are transferred and involved in the formation of hybridization with the three nearest carbon atoms in the graphene structure. Due to the nature of graphene with a high electron delocalization system, the transferred electrons are also delocalized. Since the magnetic moment for all atoms is very small, the total magnetizations of these TM-doped graphenes are almost zero, leading to a non-magnetic material.

2. While their total magnetizations are almost zero, it is still important to verify whether the spin polarization effect can cause different characteristics on the calculation results of dielectric and EELS spectra. For that purpose, the spectra for Co-doped graphene have been calculated with and without involving spin polarization. As seen in Figure S3, the dielectric and EELS spectra calculated with and without spin polarization have almost similar shapes and characteristics, such as the EELS peaks that appear around 6.166 eV (1,491 THz) and 6.121 eV (1,480 THz), respectively. In addition, their absorption spectra show also similar spectral shapes peaked at A = 4.800 eV, B = 13.791 eV and A = 4.850 eV, B = 13.732 eV for calculation results with spin-polarization and without spin-polarization, respectively. Moreover, the total energy for the Co-doped graphene structure with spin-polarization is -2640.28927220 Ry and without spin-polarization is -2640.28940001 Ry. Therefore, the calculated optical characteristics of these TM-doped graphenes are not significantly affected by spin polarization.

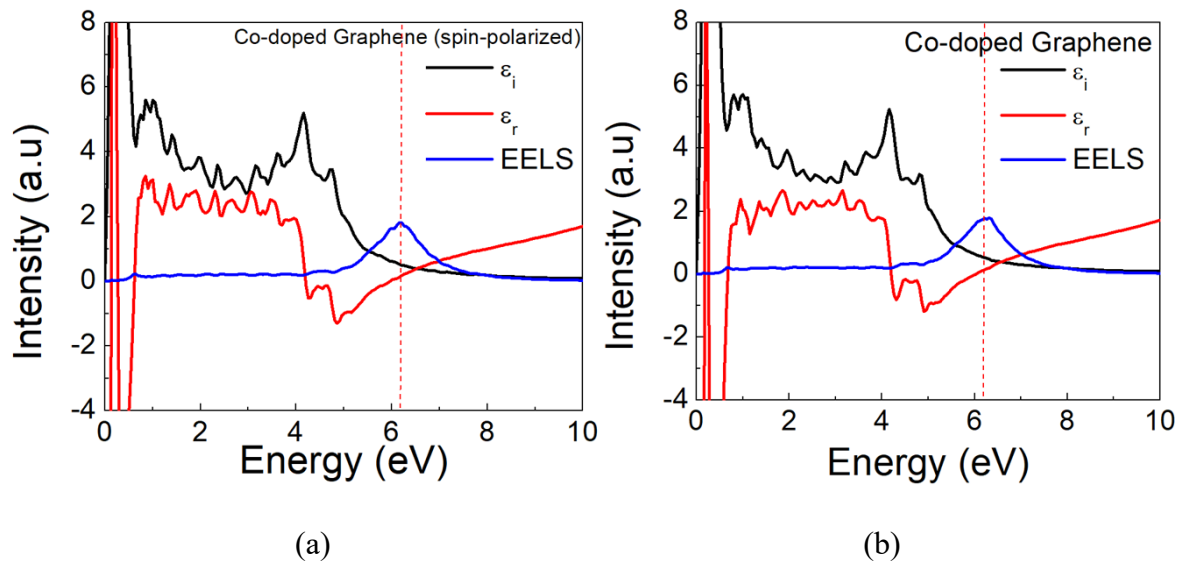

Figure S3. The calculated dielectric constants and EELS spectra of Co-doped graphene (a) with spin-polarization and (b) without spin-polarization.

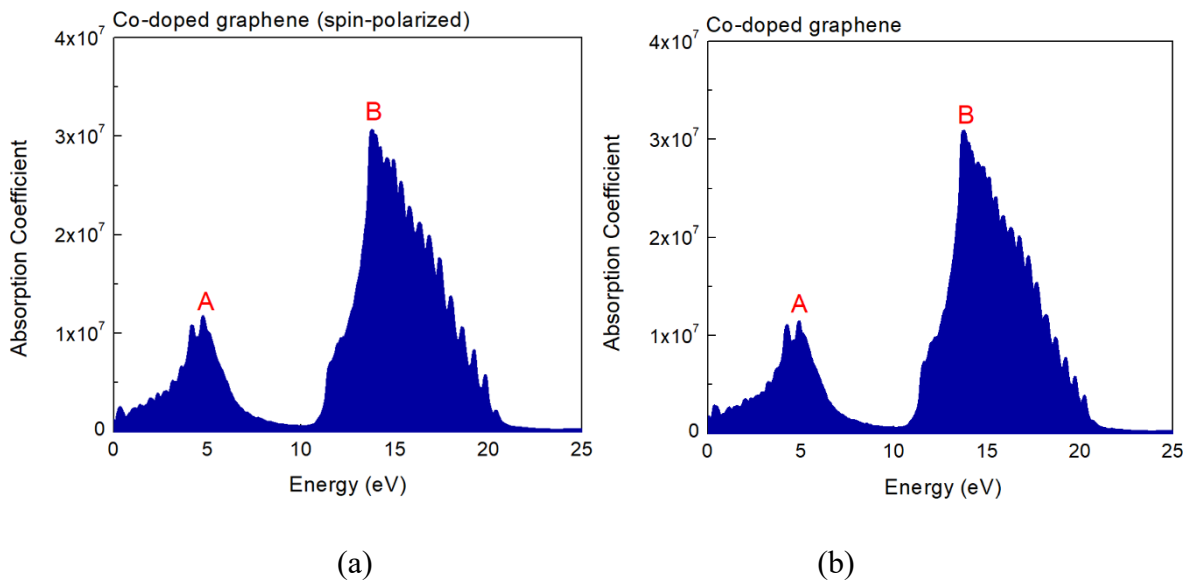

Figure S4. The calculated absorption coefficient of Co-doped graphene (a) with spin-polarization and (b) without spin-polarization effect.
